# Supplementary material for: Degenerative cervical myelopathy presenting as subjective lower limb weakness could be a trap towards misdiagnosis
Source: PubMed Central journal article supplement (PMC7712653; doi:10.1038/s41598-020-78139-y), 2020-12-03
Supplement: 41598_2020_78139_MOESM1_ESM.pdf [file 41598_2020_78139_MOESM1_ESM.pdf]

Degenerative Cervical Myelopathy Presenting as Subjective Lower Limb Weakness Could be a Trap Towards Misdiagnosis

Authors: Chi-An Luo, Meng-Ling Lu, Arun-Kumar Kaliya-Perumal, Lih-Huei Chen, Wen-Jer Chen, Chi-Chien Niu

| Case | Age | Sex | Smoke | Category | S/S duration (month) | Diagnosis                                               | Region         | OP 1                      | OP 2                                   | Nurick preop | Nurick postop 2y | JOA preop | JOA postop 6w | JOA postop 2y | Recovery rate 2y | LEFS preop | LEFS postop 6w | LEFS postop 3m | LEFS postop 6m | LEFS postop 1y | Duration from OP to improvement (month) | Follow-up (month) |
|------|-----|-----|-------|----------|----------------------|---------------------------------------------------------|----------------|---------------------------|----------------------------------------|--------------|------------------|-----------|---------------|---------------|------------------|------------|----------------|----------------|----------------|----------------|-----------------------------------------|-------------------|
| 1    | 48  | M   | N     | 1        | 12                   | DCM, C3-6                                               | CS             | ACDF                      | nil                                    | 3            | 2                | 9         | 12            | 12            | 38               | 20         | 27             | 36             | 64             | 57             | 4.4                                     | 39                |
| 2    | 59  | M   | Y     | 3        | 13                   | DCM, C4-T1                                              | CS             | ACDF                      | nil                                    | 2            | 2                | 13        | 13            | 14            | 25               | 27         | 27             | 40             | 53             | 56             | 12.0                                    | 24                |
| 3    | 64  | M   | Y     | 3        | 12                   | 1.DCM, C3-7<br>2.LS, L3-5                               | TSS (CS/LS)    | ACDF                      | Lumbar laminectomy                     | 1            | 1                | 8         | 9             | 8             | 0                | 40         | 40             | 40             | 52             | 58             | 6.0                                     | 36                |
| 4    | 61  | F   | N     | 1        | 3                    | DCM, C3-6                                               | CS             | ACDF                      | nil                                    | 3            | 2                | 12        | 16            | 14            | 40               | 34         | 44             | 36             | 70             | 60             | 12.0                                    | 24                |
| 5    | 58  | M   | Y     | 1        | 5                    | DCM, OPLL, C3-7                                         | CS             | Cervical LMP              | nil                                    | 3            | 2                | 12        | 14            | 15            | 60               | 35         | 45             | 40             | 61             | 60             | 4.2                                     | 24                |
| 6    | 32  | M   | N     | 1        | 6                    | 1.DCM, C3-6<br>2.DLS, L4-5                              | TSS (CS/LS)    | Lumbar PLF                | PCF                                    | 3            | 1                | 15        | 15            | 17            | 100              | 38         | 40             | 44             | 58             | 60             | 12.0                                    | 22                |
| 7    | 55  | M   | Y     | 2        | 2                    | 1. DCM, OPLL, C3-5<br>2. OYL of T3,4,9,10               | TSS (CS/TS)    | Cervical LMP              | Thoracic Laminectomy                   | 2            | 1                | 12        | 14            | 17            | 100              | 27         | 40             | 46             | 59             | 65             | 12.0                                    | 39                |
| 8    | 43  | F   | N     | 1        | 12                   | 1.DCM, OPLL, C4-6,<br>2.OPLL, T2-3, T6-8<br>3.DLS, L5S1 | TSS (CS/TS/LS) | Cervical LMP              | Cervical/Thoracic Laminectomy          | 3            | 3                | 10        | 10            | 11            | 14               | 40         | 44             | 44             | 64             | 61             | 6.0                                     | 60                |
| 9    | 71  | M   | N     | 1        | 4                    | 1. DCM, C6-T1<br>2. DLS, L3-5                           | TSS (CS/LS)    | Cervical laminectomy+ACDF | Lumbar PLF/TLIF                        | 3            | 3                | 10        | 9             | 9             | -14              | 20         | 46             | 58             | 52             | 63             | 12.0                                    | 48                |
| 10   | 58  | M   | N     | 2        | 5                    | 1. DCM, C4-6<br>2. LS, L3-5                             | TSS (CS/LS)    | ACDF                      | nil                                    | 1            | 1                | 13        | 15            | 14            | 25               | 27         | 40             | 44             | 52             | 63             | 2.8                                     | 48                |
| 11   | 59  | M   | Y     | 2        | 6                    | 1. DCM, C5-6<br>2. DLS, L3-5                            | TSS (CS/LS)    | ACDF                      | Lumbar PLF/TLIF                        | 2            | 3                | 11        | 13            | 10            | -17              | 40         | 44             | 35             |                | 61             | 6.0                                     | 34                |
| 12   | 57  | F   | N     | 2        | 6                    | 1. DCM, C5-6<br>2. DLS                                  | TSS (CS/LS)    | ACDF                      | nil                                    | 1            | 1                | 11        | 15            | 15            | 67               | 38         | 46             | 40             | 62             | 57             | 1.7                                     | 60                |
| 13   | 56  | F   | N     | 3        | 12                   | 1. DCM, C4-5<br>2. LS, L4-5                             | TSS (CS/LS)    | Lumbar PLF                | ACDF                                   | 1            | 1                | 12        | 14            | 16            | 80               | 40         | 34             | 40             | 52             | 57             | 7.5                                     | 48                |
| 14   | 78  | M   | N     | 2        | 6                    | DCM, C3-5                                               | CS             | ACDF                      | nil                                    | 1            | 1                | 13        | 15            | 16            | 75               | 34         | 34             | 40             | 52             | 57             | 6.0                                     | 24                |
| 15   | 47  | M   | N     | 1        | 3                    | DCM, C5-7                                               | CS             | ACDF                      | nil                                    | 3            | 2                | 10        | 13            | 14            | 57               | 36         | 40             | 36             | 56             | 59             | 4.9                                     | 60                |
| 16   | 54  | M   | Y     | 1        | 5                    | 1. DCM C3-4<br>2. TS, T12<br>3. LS, L4-S1               | TSS (CS/TS/LS) | ACDF                      | Thoracic laminectomy + Lumbar PLF/TLIF | 3            | 3                | 10        | 11            | 10            | 0                | 34         | 29             | 44             | 58             | 60             | 6.0                                     | 24                |
| 17   | 55  | F   | N     | 3        | 3                    | 1. DCM, C4-6<br>2. DLS, L4-5                            | TSS (CS/LS)    | Lumbar PLF                | ACDF                                   | 1            | 1                | 13        | 16            | 16            | 75               | 34         | 27             | 40             | 55             | 64             | 12.0                                    | 60                |
| 18   | 61  | F   | N     | 1        | 6                    | 1. DCM, OPLL, C3-6<br>2. LS, L3-L5                      | TSS (CS/LS)    | Lumbar PLF/TLIF           | Cervical LMP                           | 3            | 3                | 7         | 9             | 9             | 20               | 27         | 44             | 40             | 64             | 63             | 2.1                                     | 40                |
| 19   | 52  | F   | N     | 3        | 6                    | 1. DCM, C5-6<br>2. DLS, L3-4                            | TSS (CS/LS)    | Lumbar PLF                | ACDF                                   | 2            | 2                | 10        | 14            | 13            | 43               | 20         | 40             | 40             | 60             | 56             | 0.4                                     | 60                |
| 20   | 72  | M   | N     | 1        | 4                    | 1. DCM, C7-T1<br>2. LS, L3-5                            | TSS (CS/LS)    | Lumbar laminectomy        | Cervical laminectomy                   | 3            | 3                | 13        | 16            | 16            | 75               | 40         | 40             | 44             | 52             | 57             | 1.7                                     | 24                |
| 21   | 43  | F   | N     | 1        | 6                    | 1. DCM, OPLL, C1-5<br>2. TS, OPLL, T5-6,<br>OYL, T3-11  | TSS (CS/TS)    | PTF                       | Cervical LMP                           | 3            | 2                | 12        | 15            | 15            | 60               | 40         | 44             | 46             | 49             | 57             | 3.3                                     | 24                |
| 22   | 55  | M   | Y     | 3        | 6                    | 1. DCM, C3-5<br>2. DLS, L4-5                            | TSS (CS/LS)    | Cervical LMP              | lumbar PLF/TLIF                        | 2            | 2                | 11        | 14            | 14            | 50               | 44         | 46             | 58             |                | 60             | 2.5                                     | 36                |
| 23   | 67  | M   | Y     | 1        | 6                    | 1. DCM, C3-6<br>2. LS, L1-3                             | TSS (CS/LS)    | ACDF                      | Lumbar laminectomy                     | 3            | 2                | 11        | 14            | 15            | 67               | 46         | 44             | 57             |                | 61             | 1.7                                     | 30                |
| 24   | 48  | F   | Y     | 3        | 6                    | 1. DCM, C3-7<br>2. DLS, L4-5                            | TSS (CS/LS)    | Lumbar PLF/TLIF           | ACDF                                   | 1            | 1                | 13        | 17            | 17            | 100              | 44         | 34             | 61             | 61             | 63             | 2.8                                     | 36                |

DCM: Degenerative cervi CS: Cervical stenosis LMP: Laminoplasty (open-door)  
DLS: Degenerative lumbar stenosis TS: Thoracic stenosis PLF: Posterolateral fusion  
OPLL: Ossification of posterior longitudinal ligament TLIF: Transforaminal lumbar  
interbody fusion  
OYL: Ossification of yellow ligament LS: Lumbar stenosis  
TSS: Tandem spinous process fusion PCF: Posterior cervical fusion  
PTF: Posterior thoracic fusion
